# Supplementary material for: Atomistic Mechanisms of Human TRPA1 Activation By Electrophile Irritants Through Molecular Dynamics Simulation and Mutual Information Analysis
Source: Research Square preprint supplement (doi:10.21203/rs.3.rs-1138621/v1), 2021-12-16
Supplement: Supplementary file 1 [file c52dea725eb3217ea3686587.pdf]

## **SUPPLEMENTARY INFORMATION**

### **Atomistic mechanisms of human TRPA1 activation by electrophile irritants through molecular dynamics simulation and mutual information analysis**

Matthew Habgood<sup>1,2\*</sup>, David Seiferth, Afroditi-Maria Zaki<sup>1</sup>, Irfan Alibay<sup>1</sup>, and Philip C. Biggin<sup>1\*</sup>

<sup>1</sup>Department of Biochemistry, University of Oxford, South Parks Road, Oxford. OX1 3QU. UK.

<sup>2</sup>AWE Aldermaston, Reading, Berkshire, RG7 4PR. UK.

UK Ministry of Defence © Crown Owned Copyright 2021 / AWE

**Fig S1. Individual RMSD time series of the backbone atoms for each repetition.**

RMSDs are shown for simulations based on experimental structures 6PQQ (A-C), 6PQP (D-F) and 6V9X (G-I).

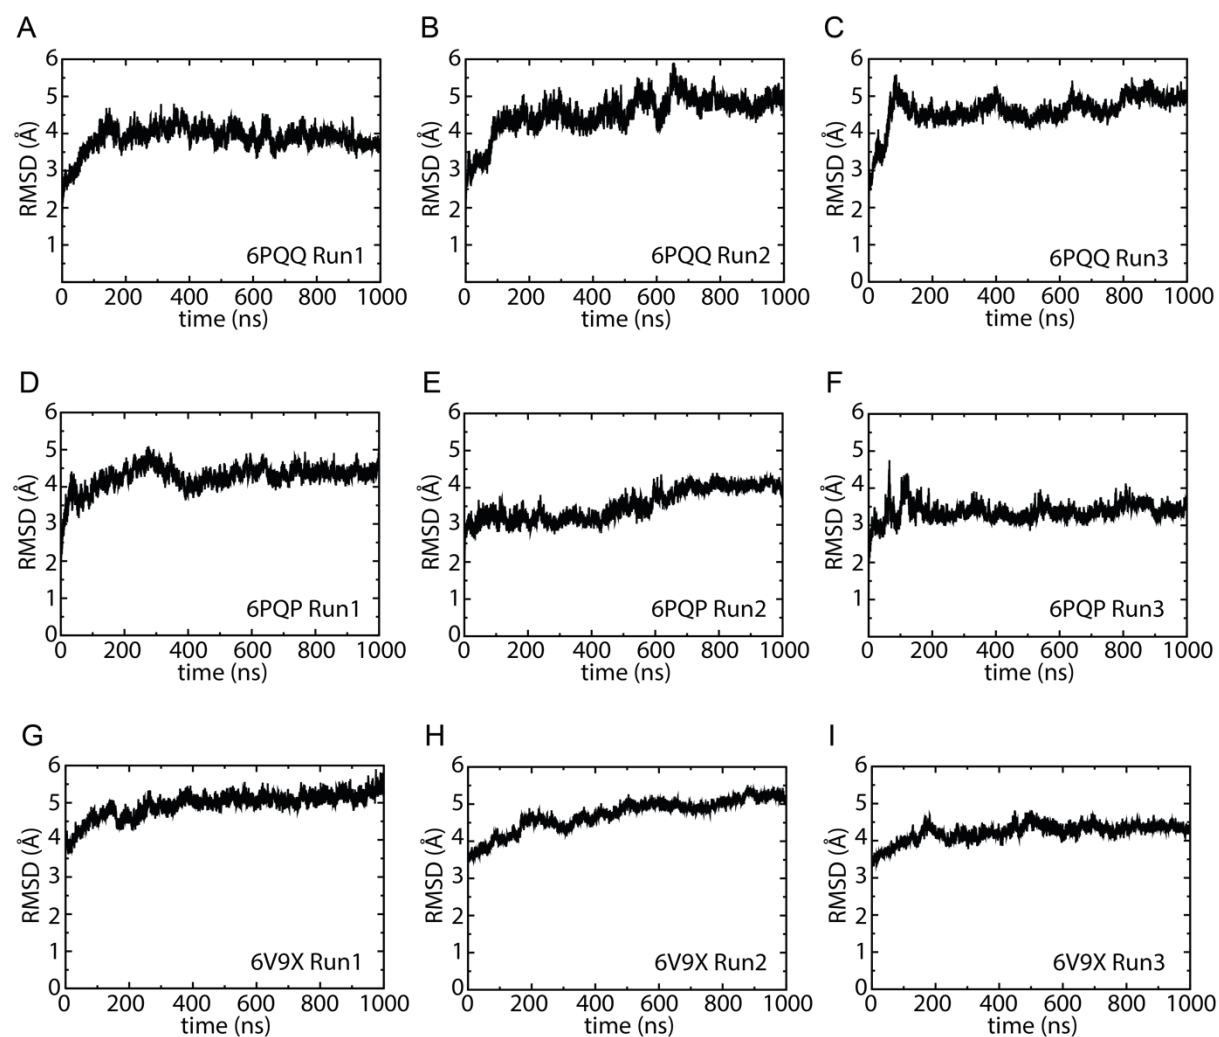

**Fig S2. Pore radius profiles.** Pore radius (computed for the transmembrane region only) as a function of the z coordinate within the simulation box are shown for simulations based on experimental structures for (A-C) 6PQQ, (D-F) 6PQP and (G-I) 6V9X. V961, which is considered as the main gating residue is located at z = -24 Å.

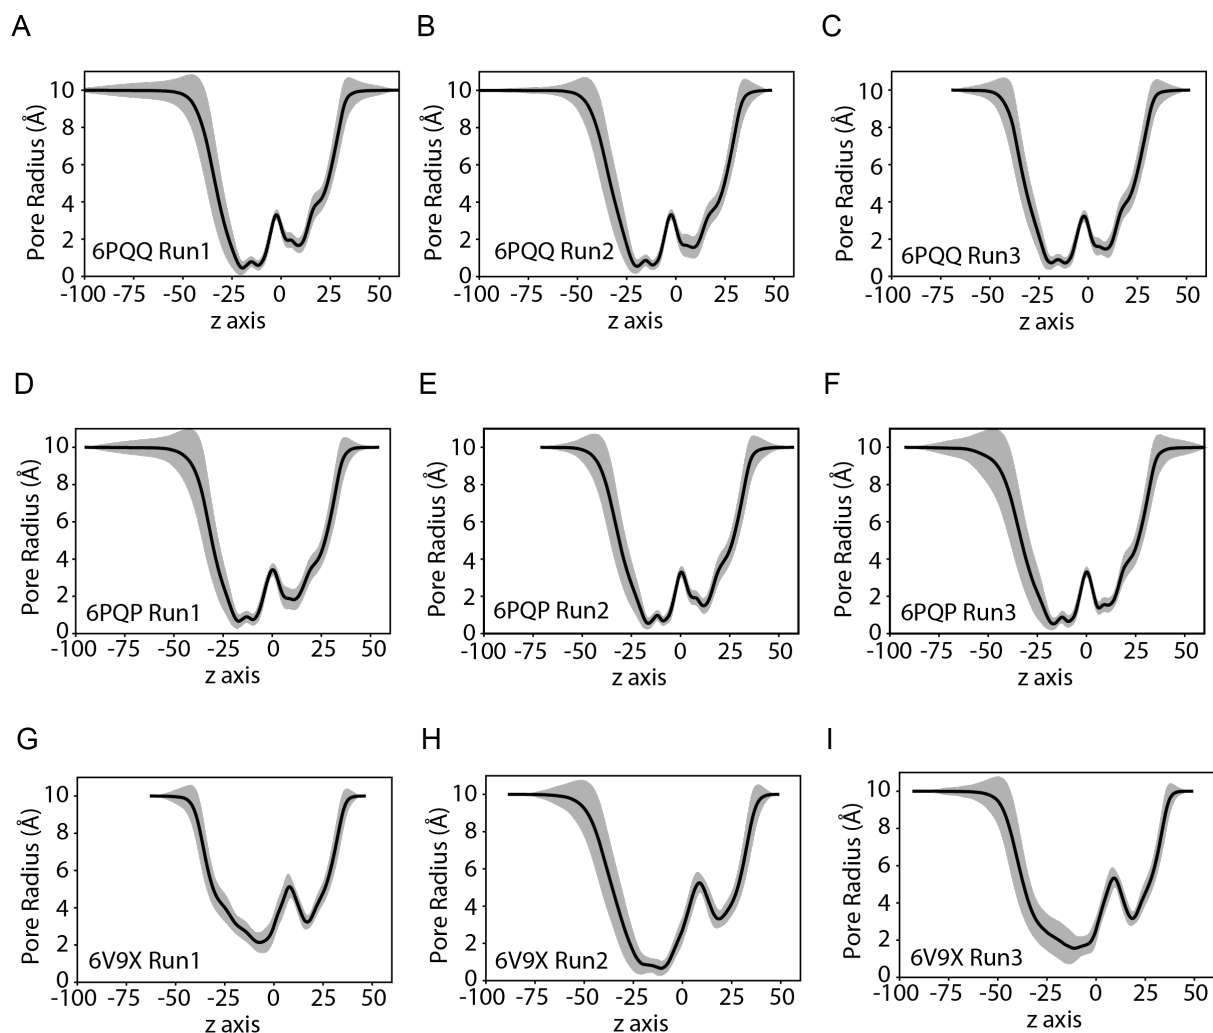

**Fig S3. Pore radius profiles for 6V9X in various alternative conditions.** Pore radius (computed for the transmembrane region only) as a function of the z coordinate within the simulation box are shown for simulations for **(A-C)** 6V9X with the ligand deleted, **(D-F)** 6V9X with iodoacetamide covalently bound to Cys665 and **(G-I)** 6V9X with benzyl isothiocyanate (BITC) covalently bound at Cys621. V961, which is considered as the main gating residue is located at z = -24 Å.

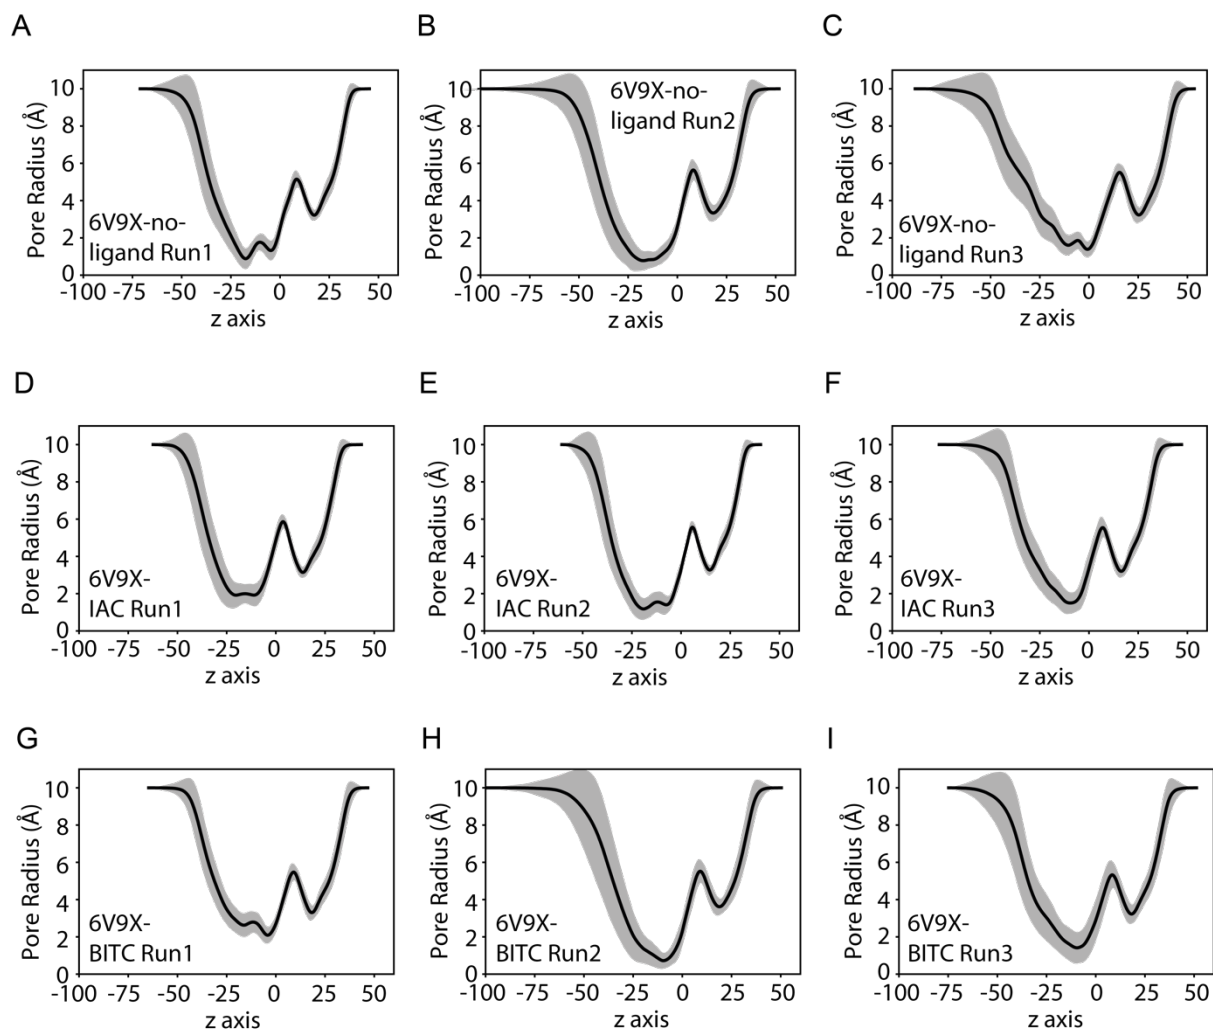

**Fig S4. Pocket width time series.** The width of the pocket as indicated by the  $C_{\alpha}$ - $C_{\alpha}$  distance between residues Lys610 (lower lip) and Leu 667 (upper lip) for (A-C) 6PQQ, (D-F) 6PQP and (G-I) 6V9X simulations. Corresponding distances in 6PQQ (pore closed, pocket closed) and 6V9X (pore open, pocket open) are 9.4 Å and 15.5 Å, respectively.

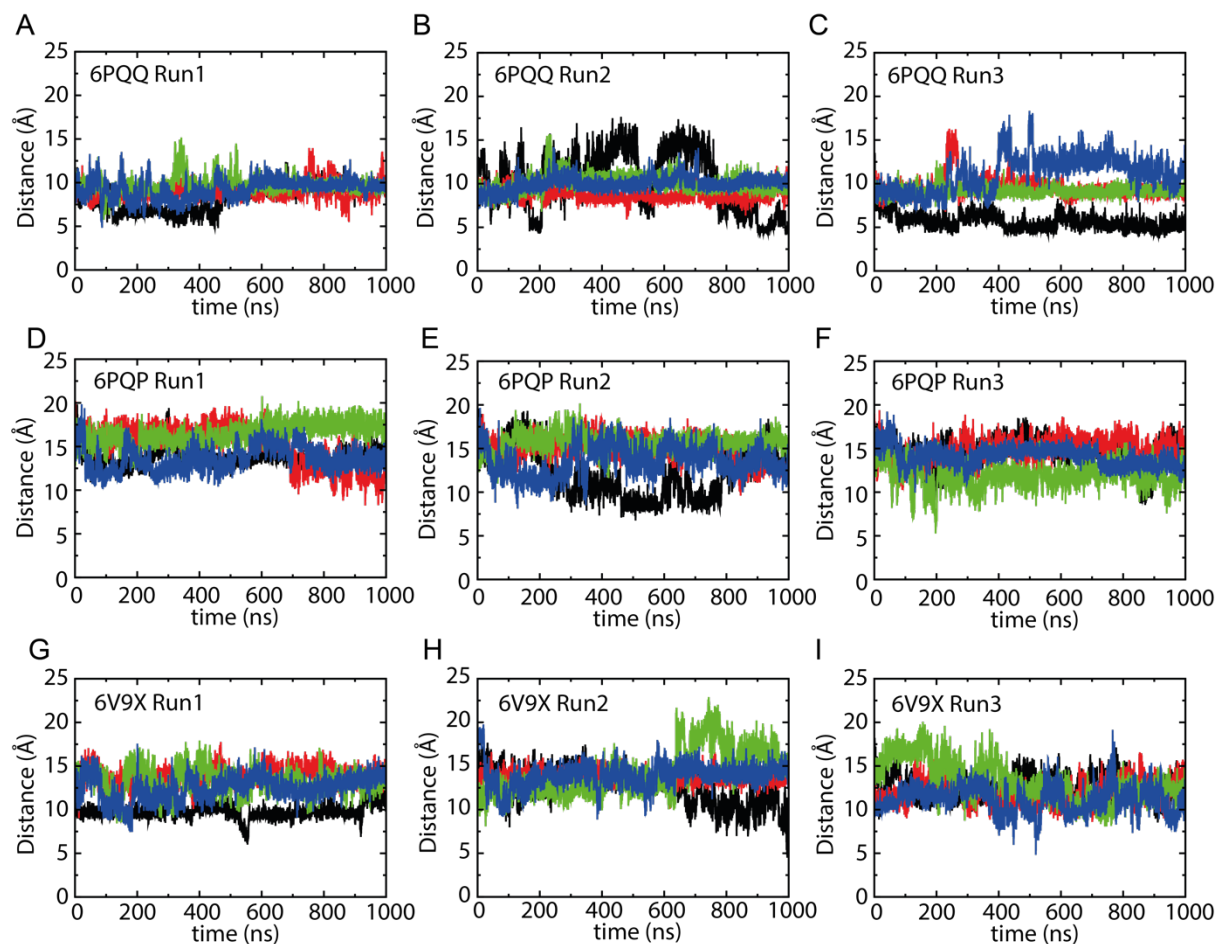

**Fig S5. Pocket width time series for 6V9X in various alternative conditions.** The width of the pocket as indicated by the C $\alpha$ -C $\alpha$  distance between residues Lys610 (lower lip) and Leu 667 (upper lip) for **(A-C)** 6V9X with the ligand deleted, **(D-F)** 6V9X with iodoacetamide covalently bound to Cys665 and **(G-I)** 6V9X with benzyl isothiocyanate (BITC) covalently bound at Cys621. Corresponding distances in 6PQQ (pore closed, pocket closed) and 6V9X (pore open, pocket open) are 9.4 Å and 15.5 Å, respectively.

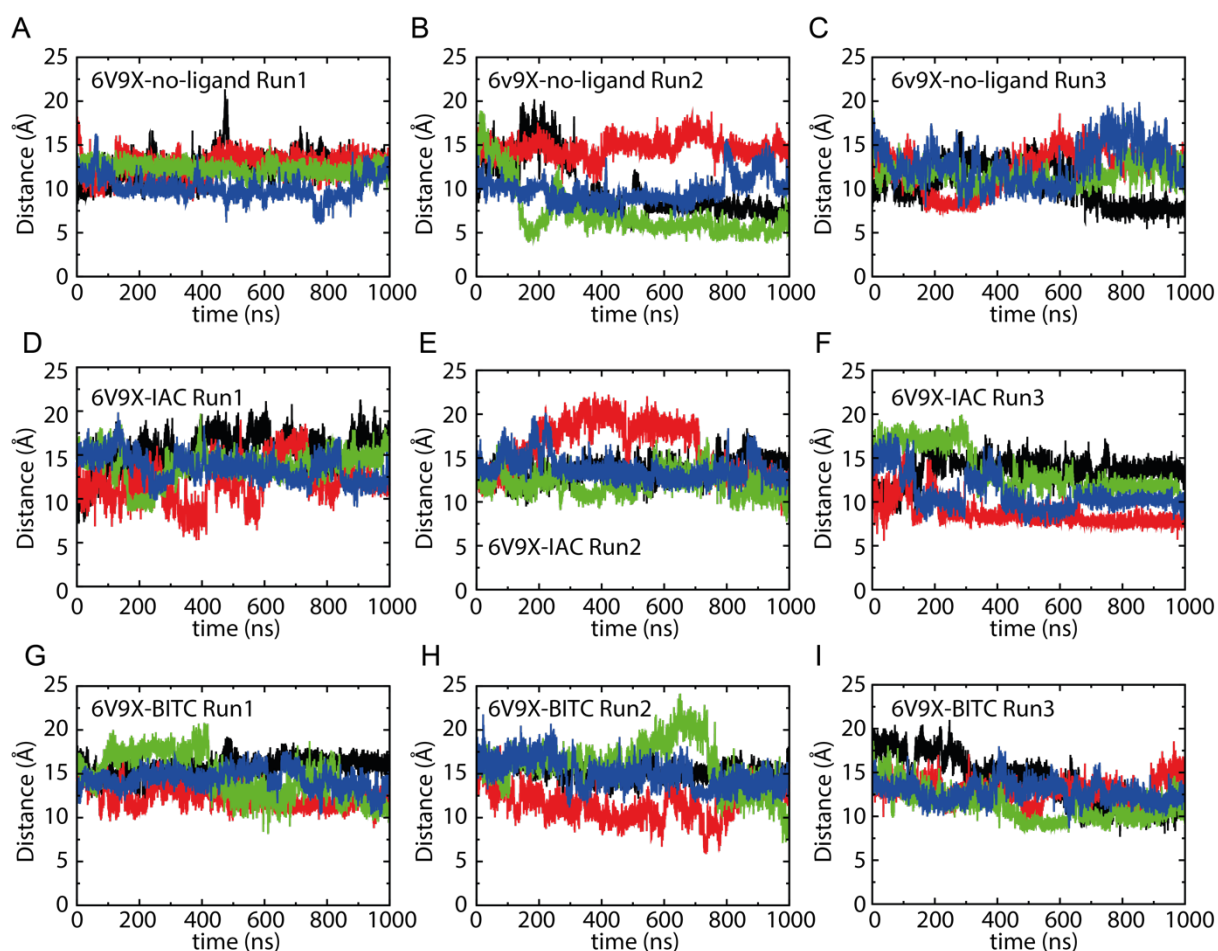

### **Text S6. Mutual information data**

Pairwise mutual information was calculated between the residues of a set of chain segments in the region between the cysteine 621 ligand binding pocket, and the ion pore. As shown in the main paper, Figure 1A, these segments are: the ligand binding pocket lid (H4) (Gln664-Thr684); the loop above the pocket lid (H7), TRP-like domain and transmembrane domain helix (part of S6) (Val961-Lys1001) ; the VSLD helix threaded through loop above pocket lid (S1) (Tyr706-Val737); and the VSLD helix (S4) and connected TMD helix immediately adjoining Val961 (S5) (Gln831-Val861).

For analysis purposes, these were further split down into seven sub-segments:

Segment 1: the binding pocket lid (H4) [Gln664 – Thr 684]

Segment 2: the loop above the binding pocket lid (H7) [His983 – Lys1001]

Segment 3: the section of the outer upright in the VSLD adjacent to segment 2 (S1) [Tyr706 – Tyr714]

Segment 4: the upper part of the outer upright in the VSLD (S1) [His719 – Val737]

Segment 5: the inner upright in the VSLD (S4) [Gln831 – Phe 853]

Segment 6: the loop in the transmembrane domain, connected to S4, adjacent to the TRP domain and pore-bordering helix (S5) [Glu854 – Val861]

Segment 7: the TRP domain and pore-adjacent helix (S6) [Val961 - Gln979]
